# Supplementary material for: Safe and sustainable development of advanced materials: UK National Knowledge Sharing Network Workshops
Source: Royal Society of Chemistry journal article supplement (doi:10.1039/d4en00555d), 2025-01-01
Supplement: d4en00555d6.pdf [file d4en00555d6.pdf]

Verification centre  
Public-private partnership Establish task force  
Face to face when allowed Greater participation BSI  
Link groups discussing it Collate in a central hub  
Focused training sessions Data infrastructure  
**(More) Workshops** Wiki  
Case studies or scenarios Website  
Online networking (events)  
HSE-UKHSA-NPL safety centre  
Expert network Regulators SME academics  
Blog Engage with more sectors  
Government/DEFRA support  
Open innovation platforms Training next generation  
Hub Email/newsletter Shared databases
