# Supplementary material for: Safe and sustainable development of advanced materials: UK National Knowledge Sharing Network Workshops
Source: Royal Society of Chemistry journal article supplement (doi:10.1039/d4en00555d), 2025-01-01
Supplement: d4en00555d7.pdf [file d4en00555d7.pdf]

## Supplementary Information

### Safe and Sustainable Development of Advanced Materials: UK National Knowledge Sharing Network Workshops

Charles A. Clifford<sup>1</sup>, Delphine Bard<sup>2</sup>, Fernando A. Castro<sup>1</sup>, Gareth S. Evans<sup>2</sup>, Mark Gee<sup>1</sup>, Samantha Hall<sup>2</sup>, Stephanie Kitchen<sup>1,3</sup>, Denis Koltsov<sup>4</sup>, Alex Price<sup>5</sup>, Rachel Smith<sup>6</sup> and Fatima Nasser<sup>7</sup>

<sup>1</sup>National Physical Laboratory (NPL), Hampton Road, Teddington, TW11 0LW, UK

<sup>2</sup>Health and Safety Executive Science (HSE) Science Division (SD), Harpur Hill, Buxton, SK17 9JN, UK

<sup>3</sup>Department for Science, Innovation and Technology (DSIT), 100 Parliament Street, London, SW1A 2BQ, UK

<sup>4</sup>BREC Solutions, 43 Bank Rd, Lancaster LA1 2DG, UK

<sup>5</sup>British Standards Institute (BSI), 389 Chiswick High Road, London, W4 4AL, UK

<sup>6</sup>UK Health Security Agency (UKHSA), Harwell Campus, Chilton, OX11 0RQ, UK

<sup>7</sup>Department for Food, Environment & Rural Affairs (Defra), 17 Smith Square, London, SW1P 3JR, UK

This supplementary information contains additional word clouds gathered during the interactive session during the first UK advanced materials workshop.

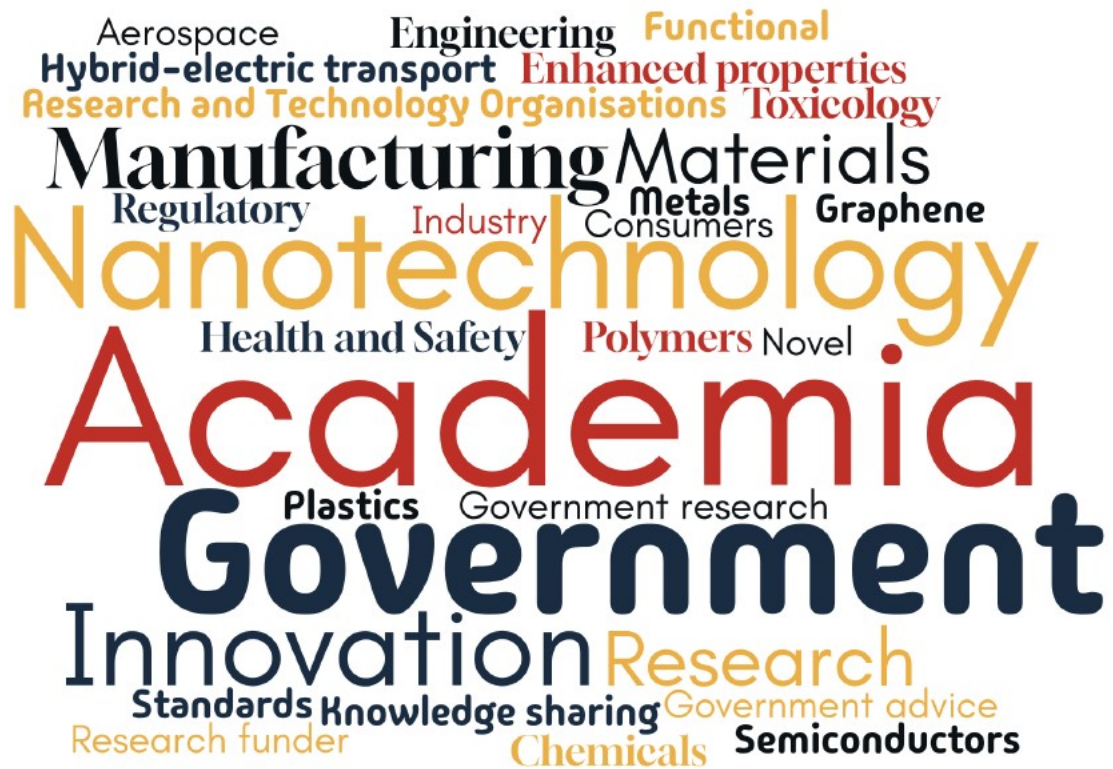

Fig

ure S1. Word cloud response to question - *What sector do you represent?* (53 responses). Note that limited preprocessing of responses was undertaken prior to generating word clouds to group similar terms and harmonise.

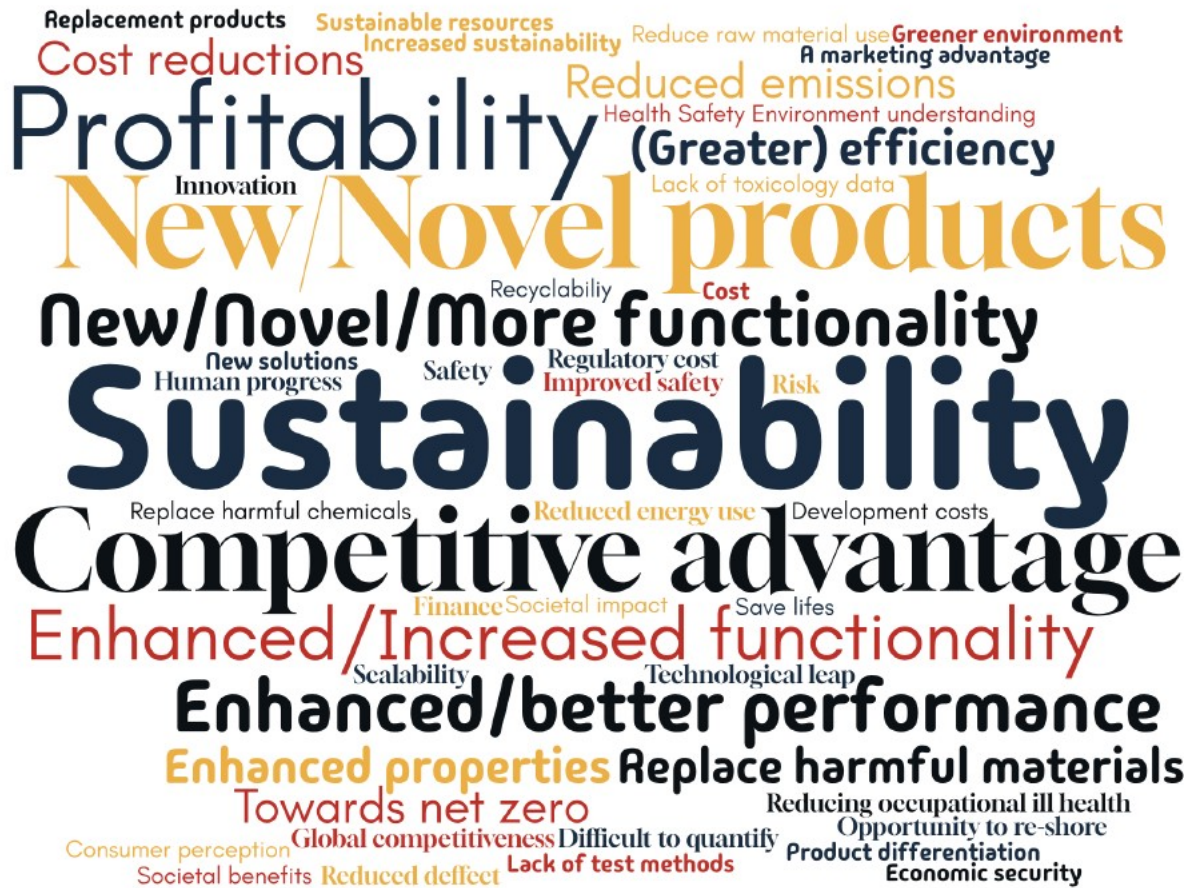

**Figure S2.** Word cloud response to question - *What are the benefits to commercialisation of advanced materials?* (84 responses). Note that limited preprocessing of responses was undertaken prior to generating word clouds to group similar terms and harmonise.

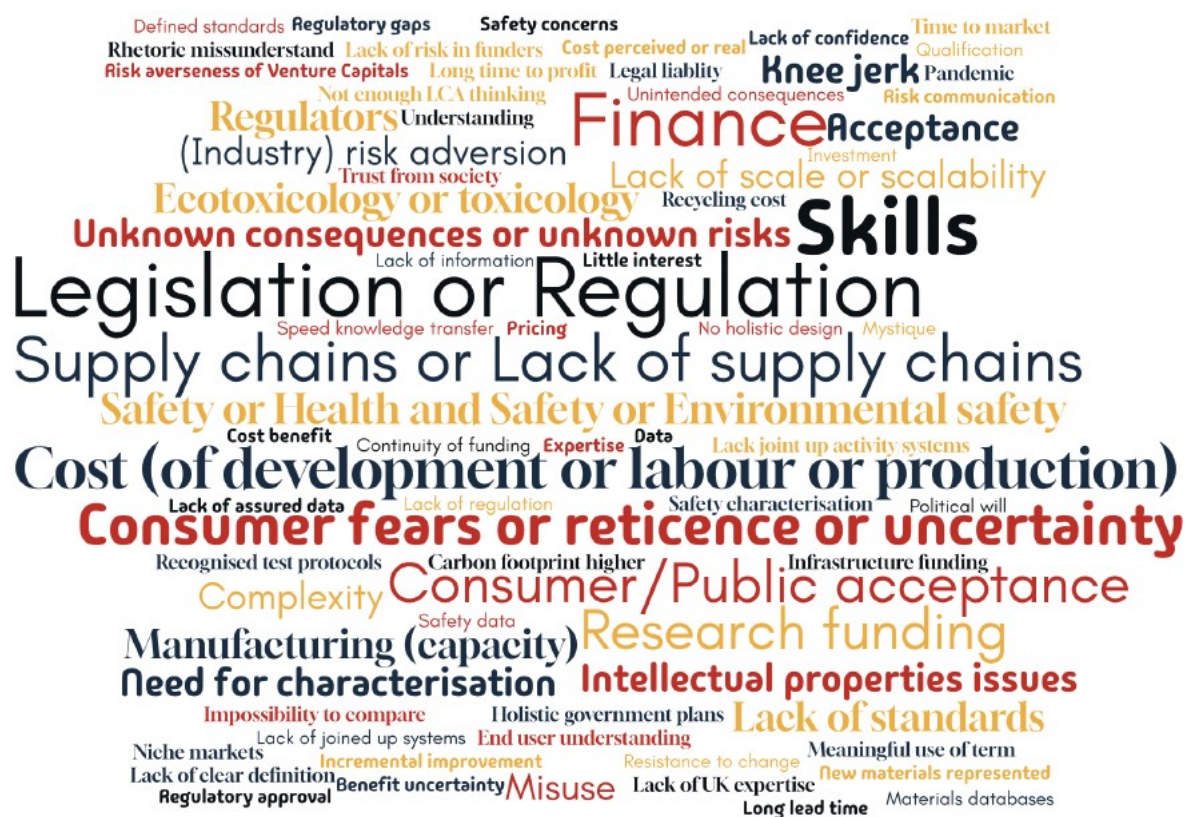

**Figure S3.** Word cloud response to question - *What are the barriers to commercialisation of advanced materials?* (122 responses). Note that limited preprocessing of responses was undertaken prior to generating word clouds to group similar terms and harmonise.



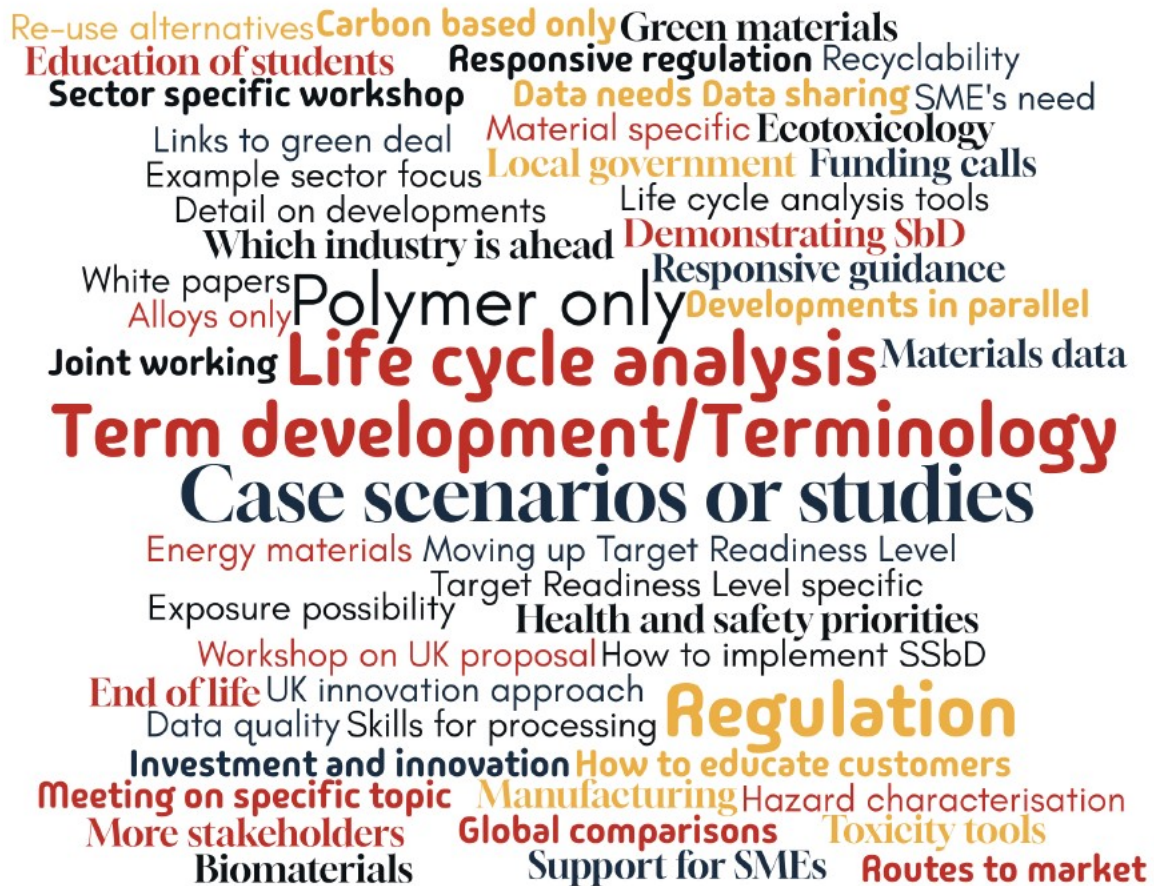

F

**Figure S4.** Word cloud response to question - *What would you find useful as a follow up topic for a future meeting related to safe development of Advanced Materials?* (58 responses). Note that limited preprocessing of responses was undertaken prior to generating word clouds to group similar terms and harmonise.

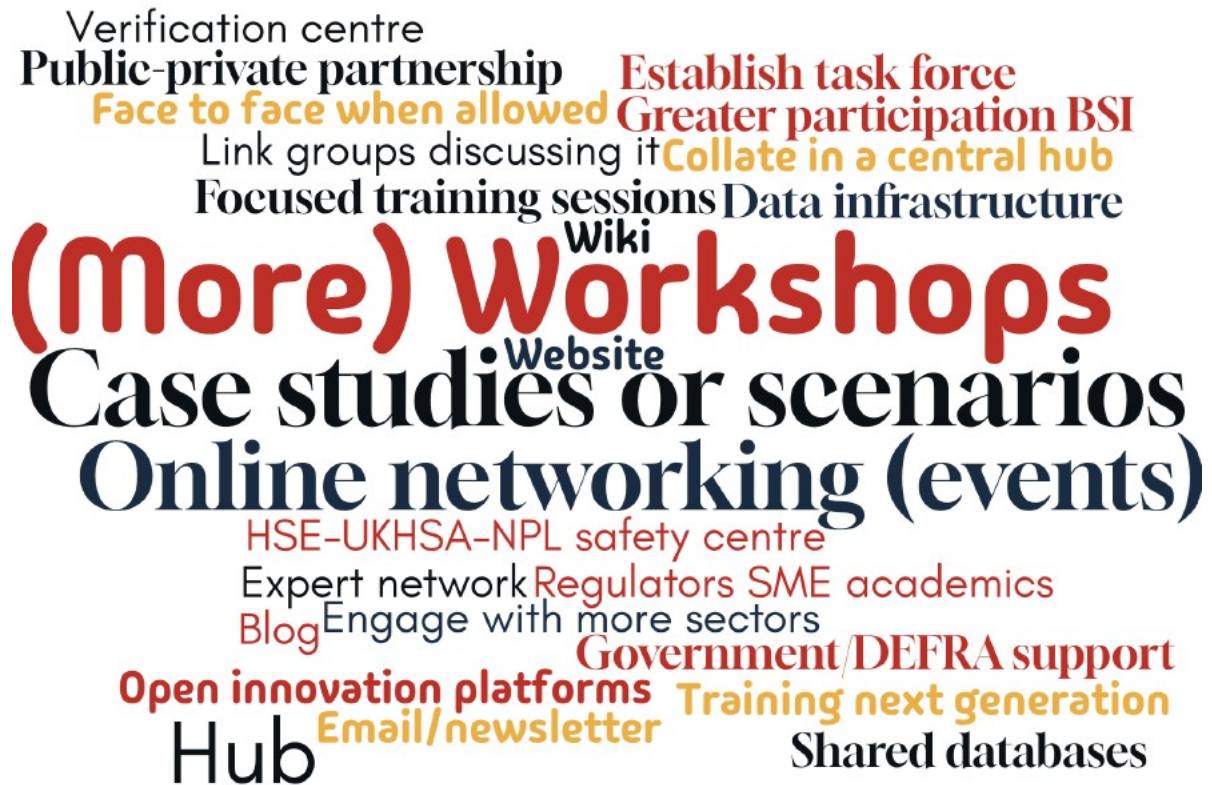

**Figure S5.** Word cloud response to question – *How can we more effectively exchange information about this subject?* (33 responses). Note that limited preprocessing of responses was undertaken prior to generating word clouds to group similar terms and harmonise.
