# Supplementary figures and images for: Safe and sustainable development of advanced materials: UK National Knowledge Sharing Network Workshops
Source: Royal Society of Chemistry journal article supplement (doi:10.1039/d4en00555d), 2025-01-01

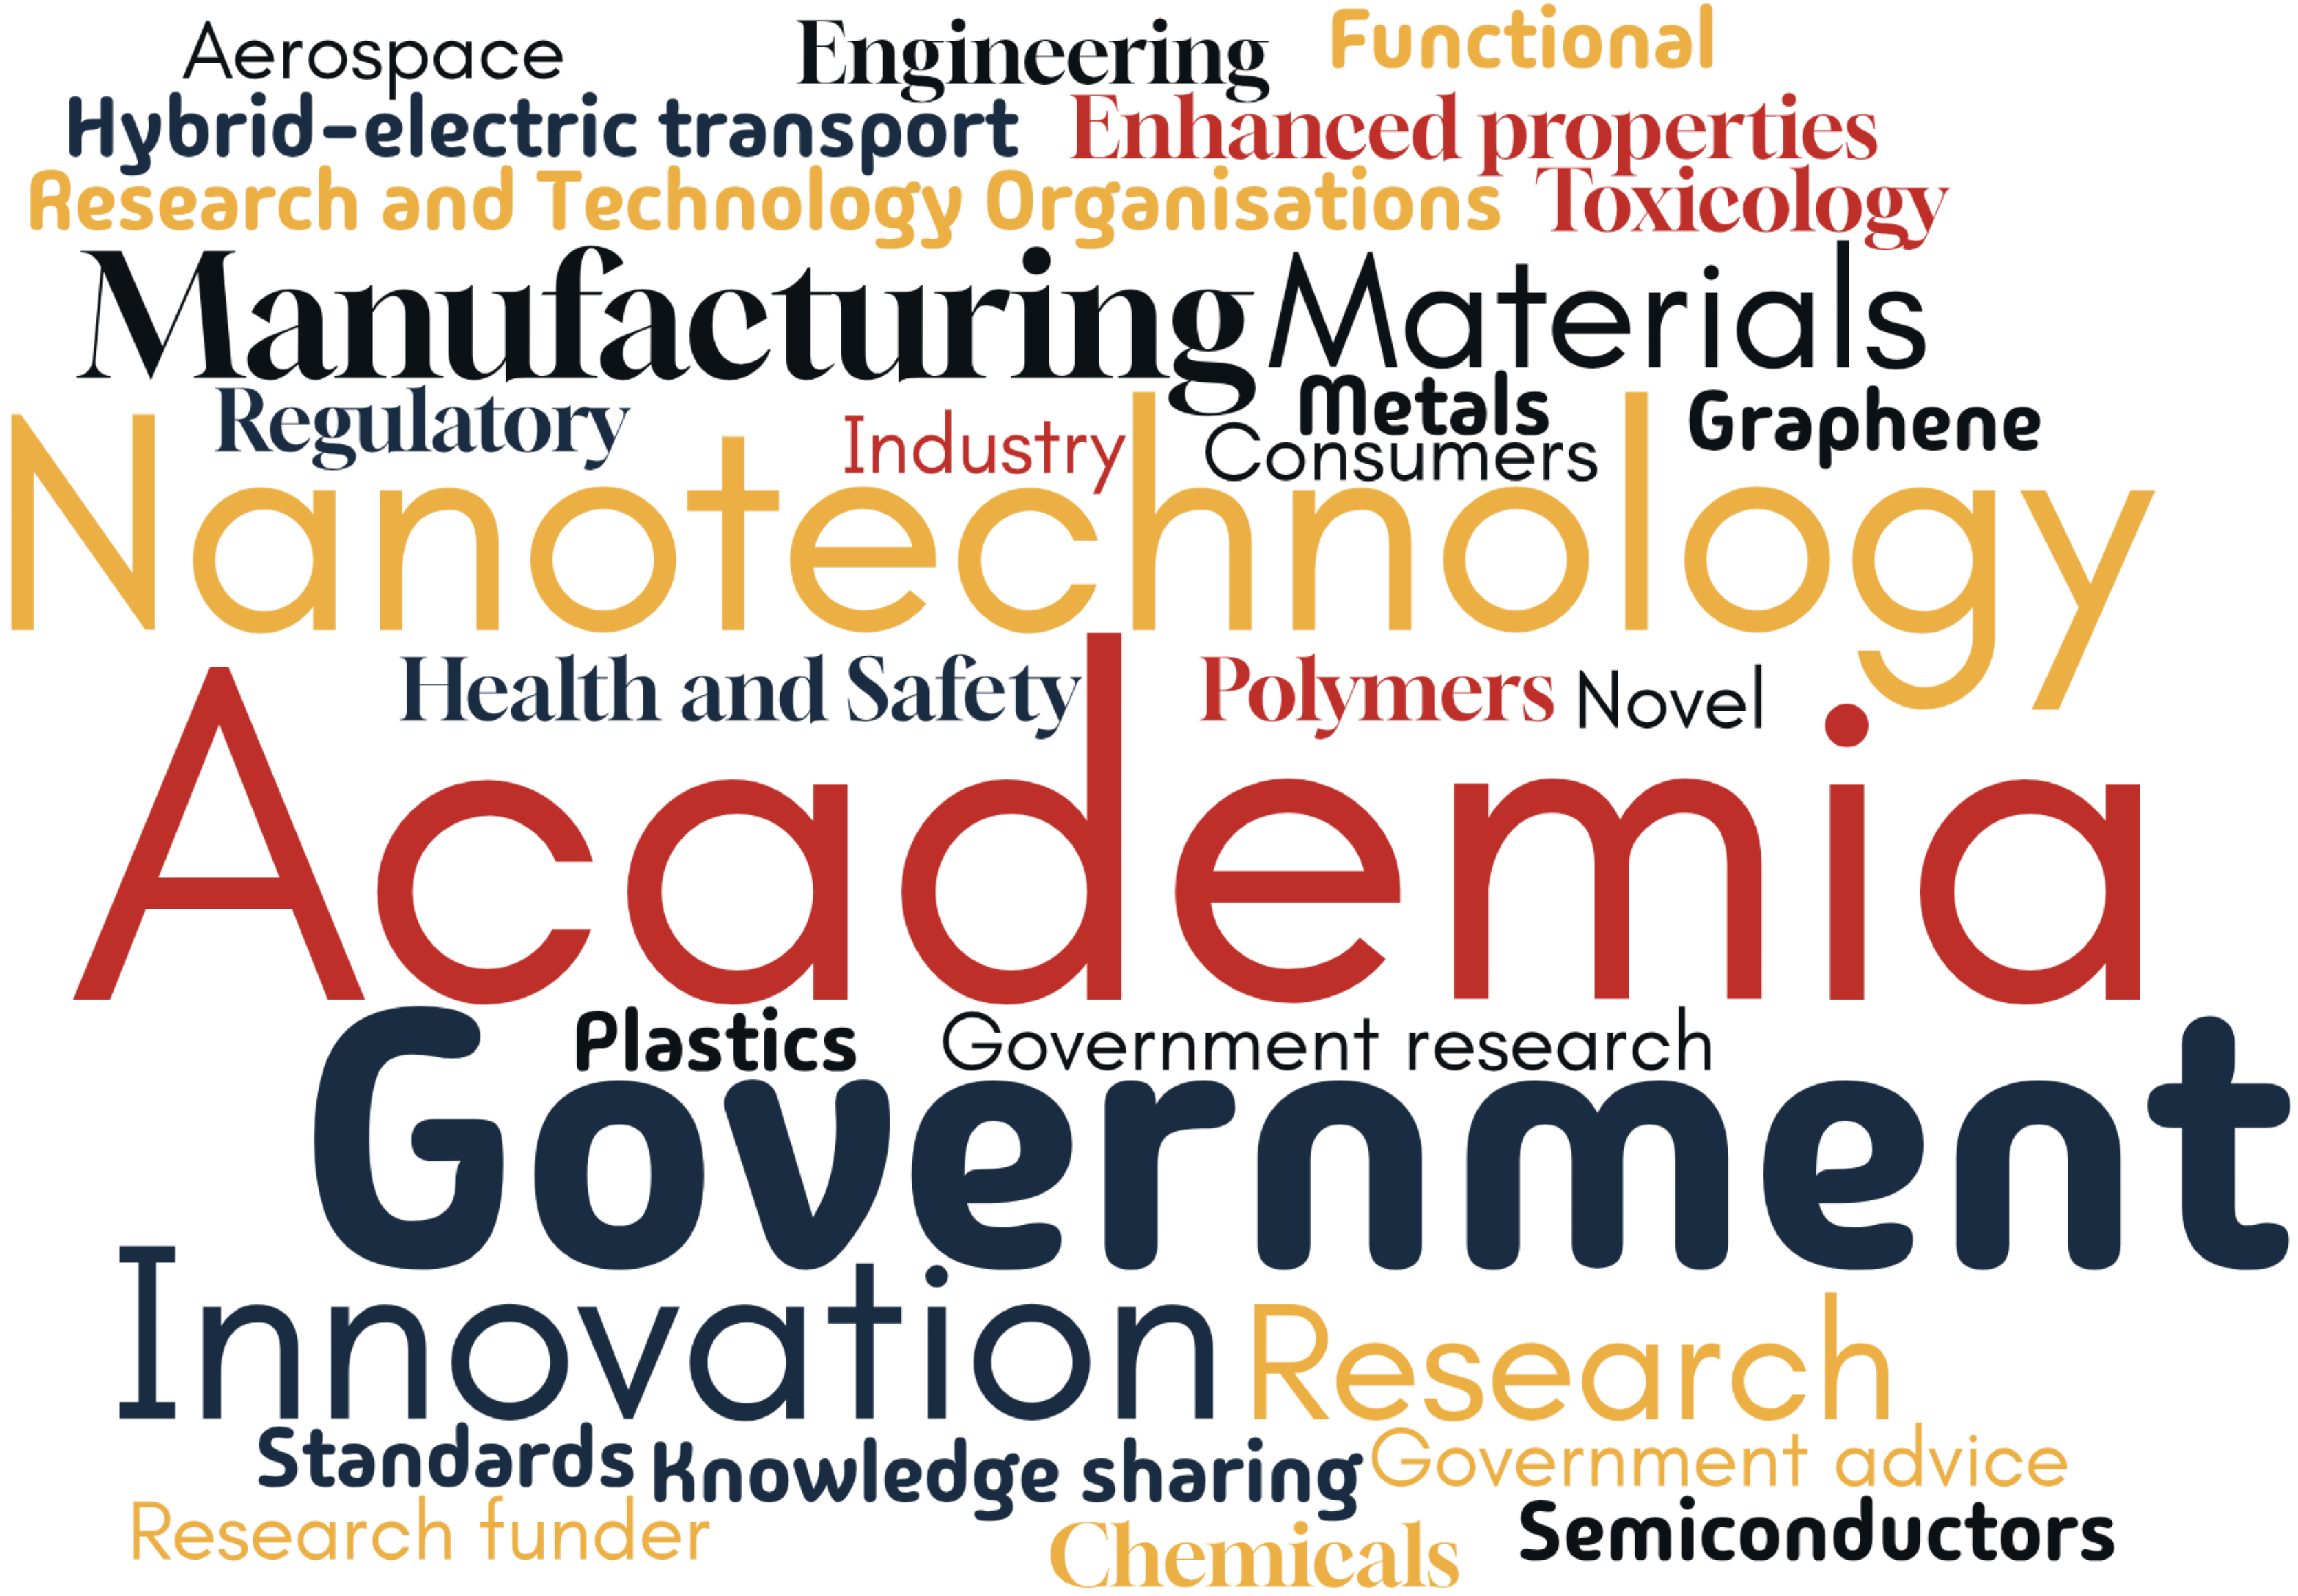

Supplement: d4en00555d2.pdf [file d4en00555d2.pdf]

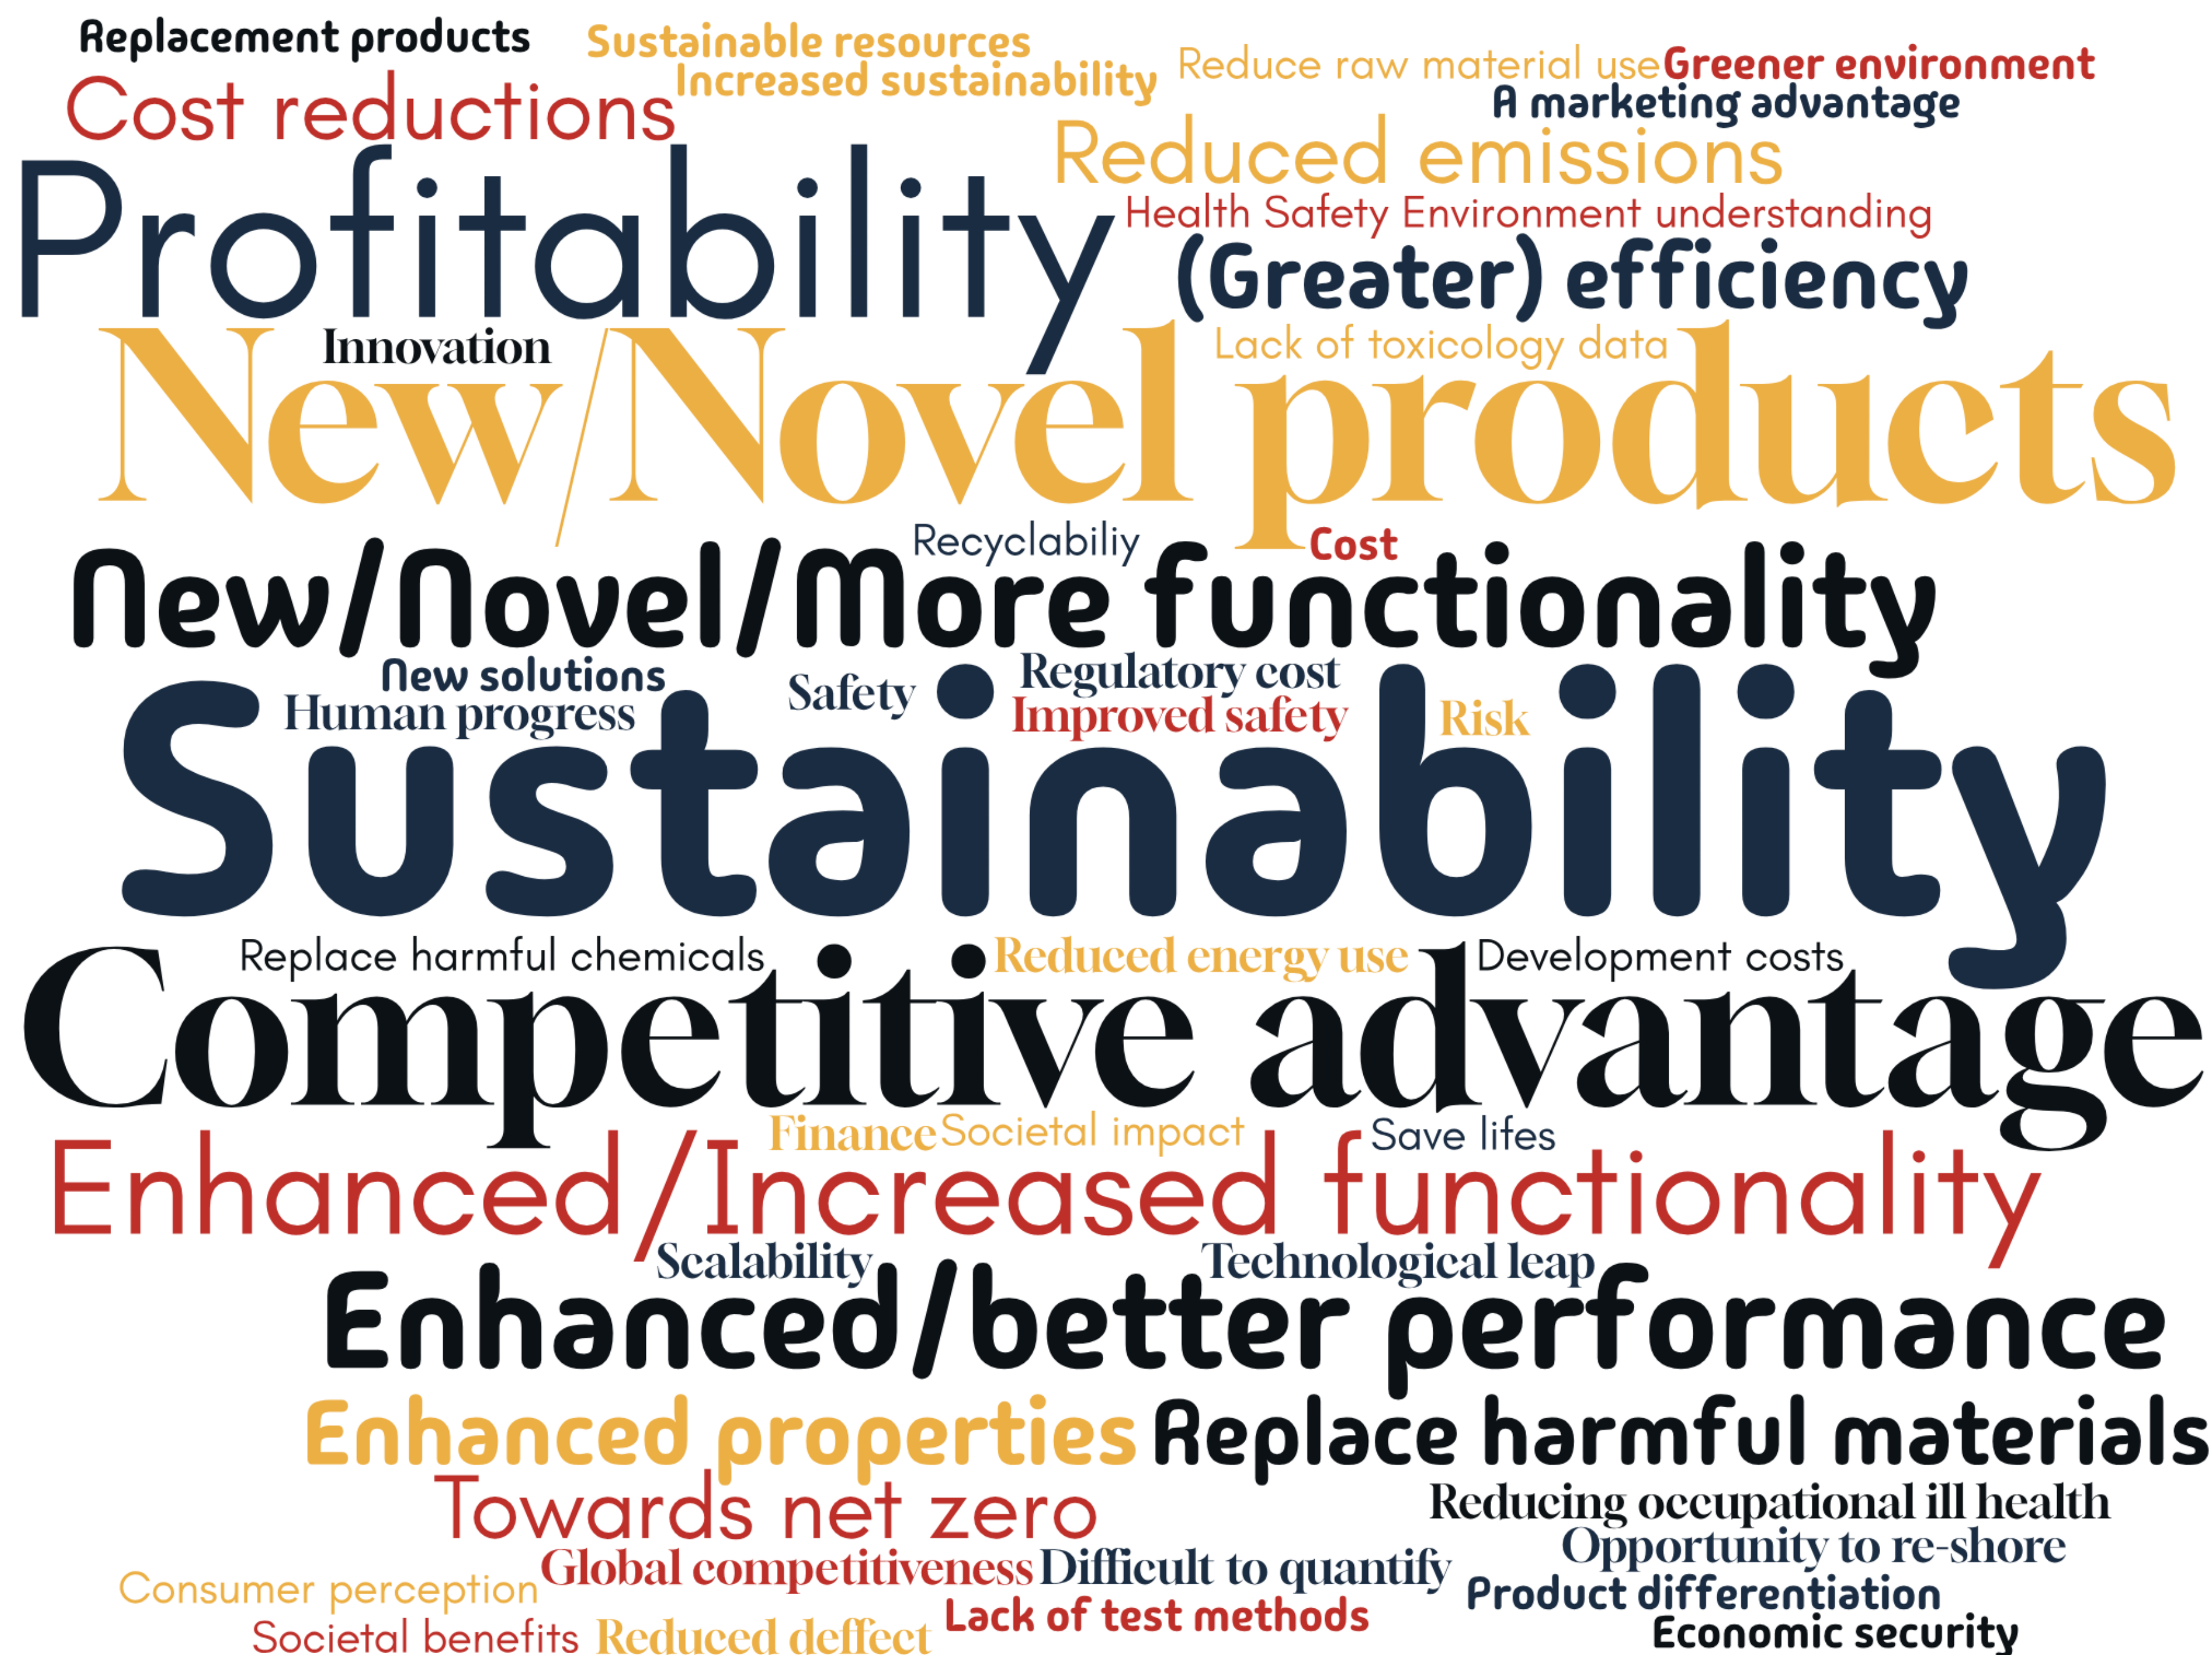

Supplement: d4en00555d3.pdf [file d4en00555d3.pdf]

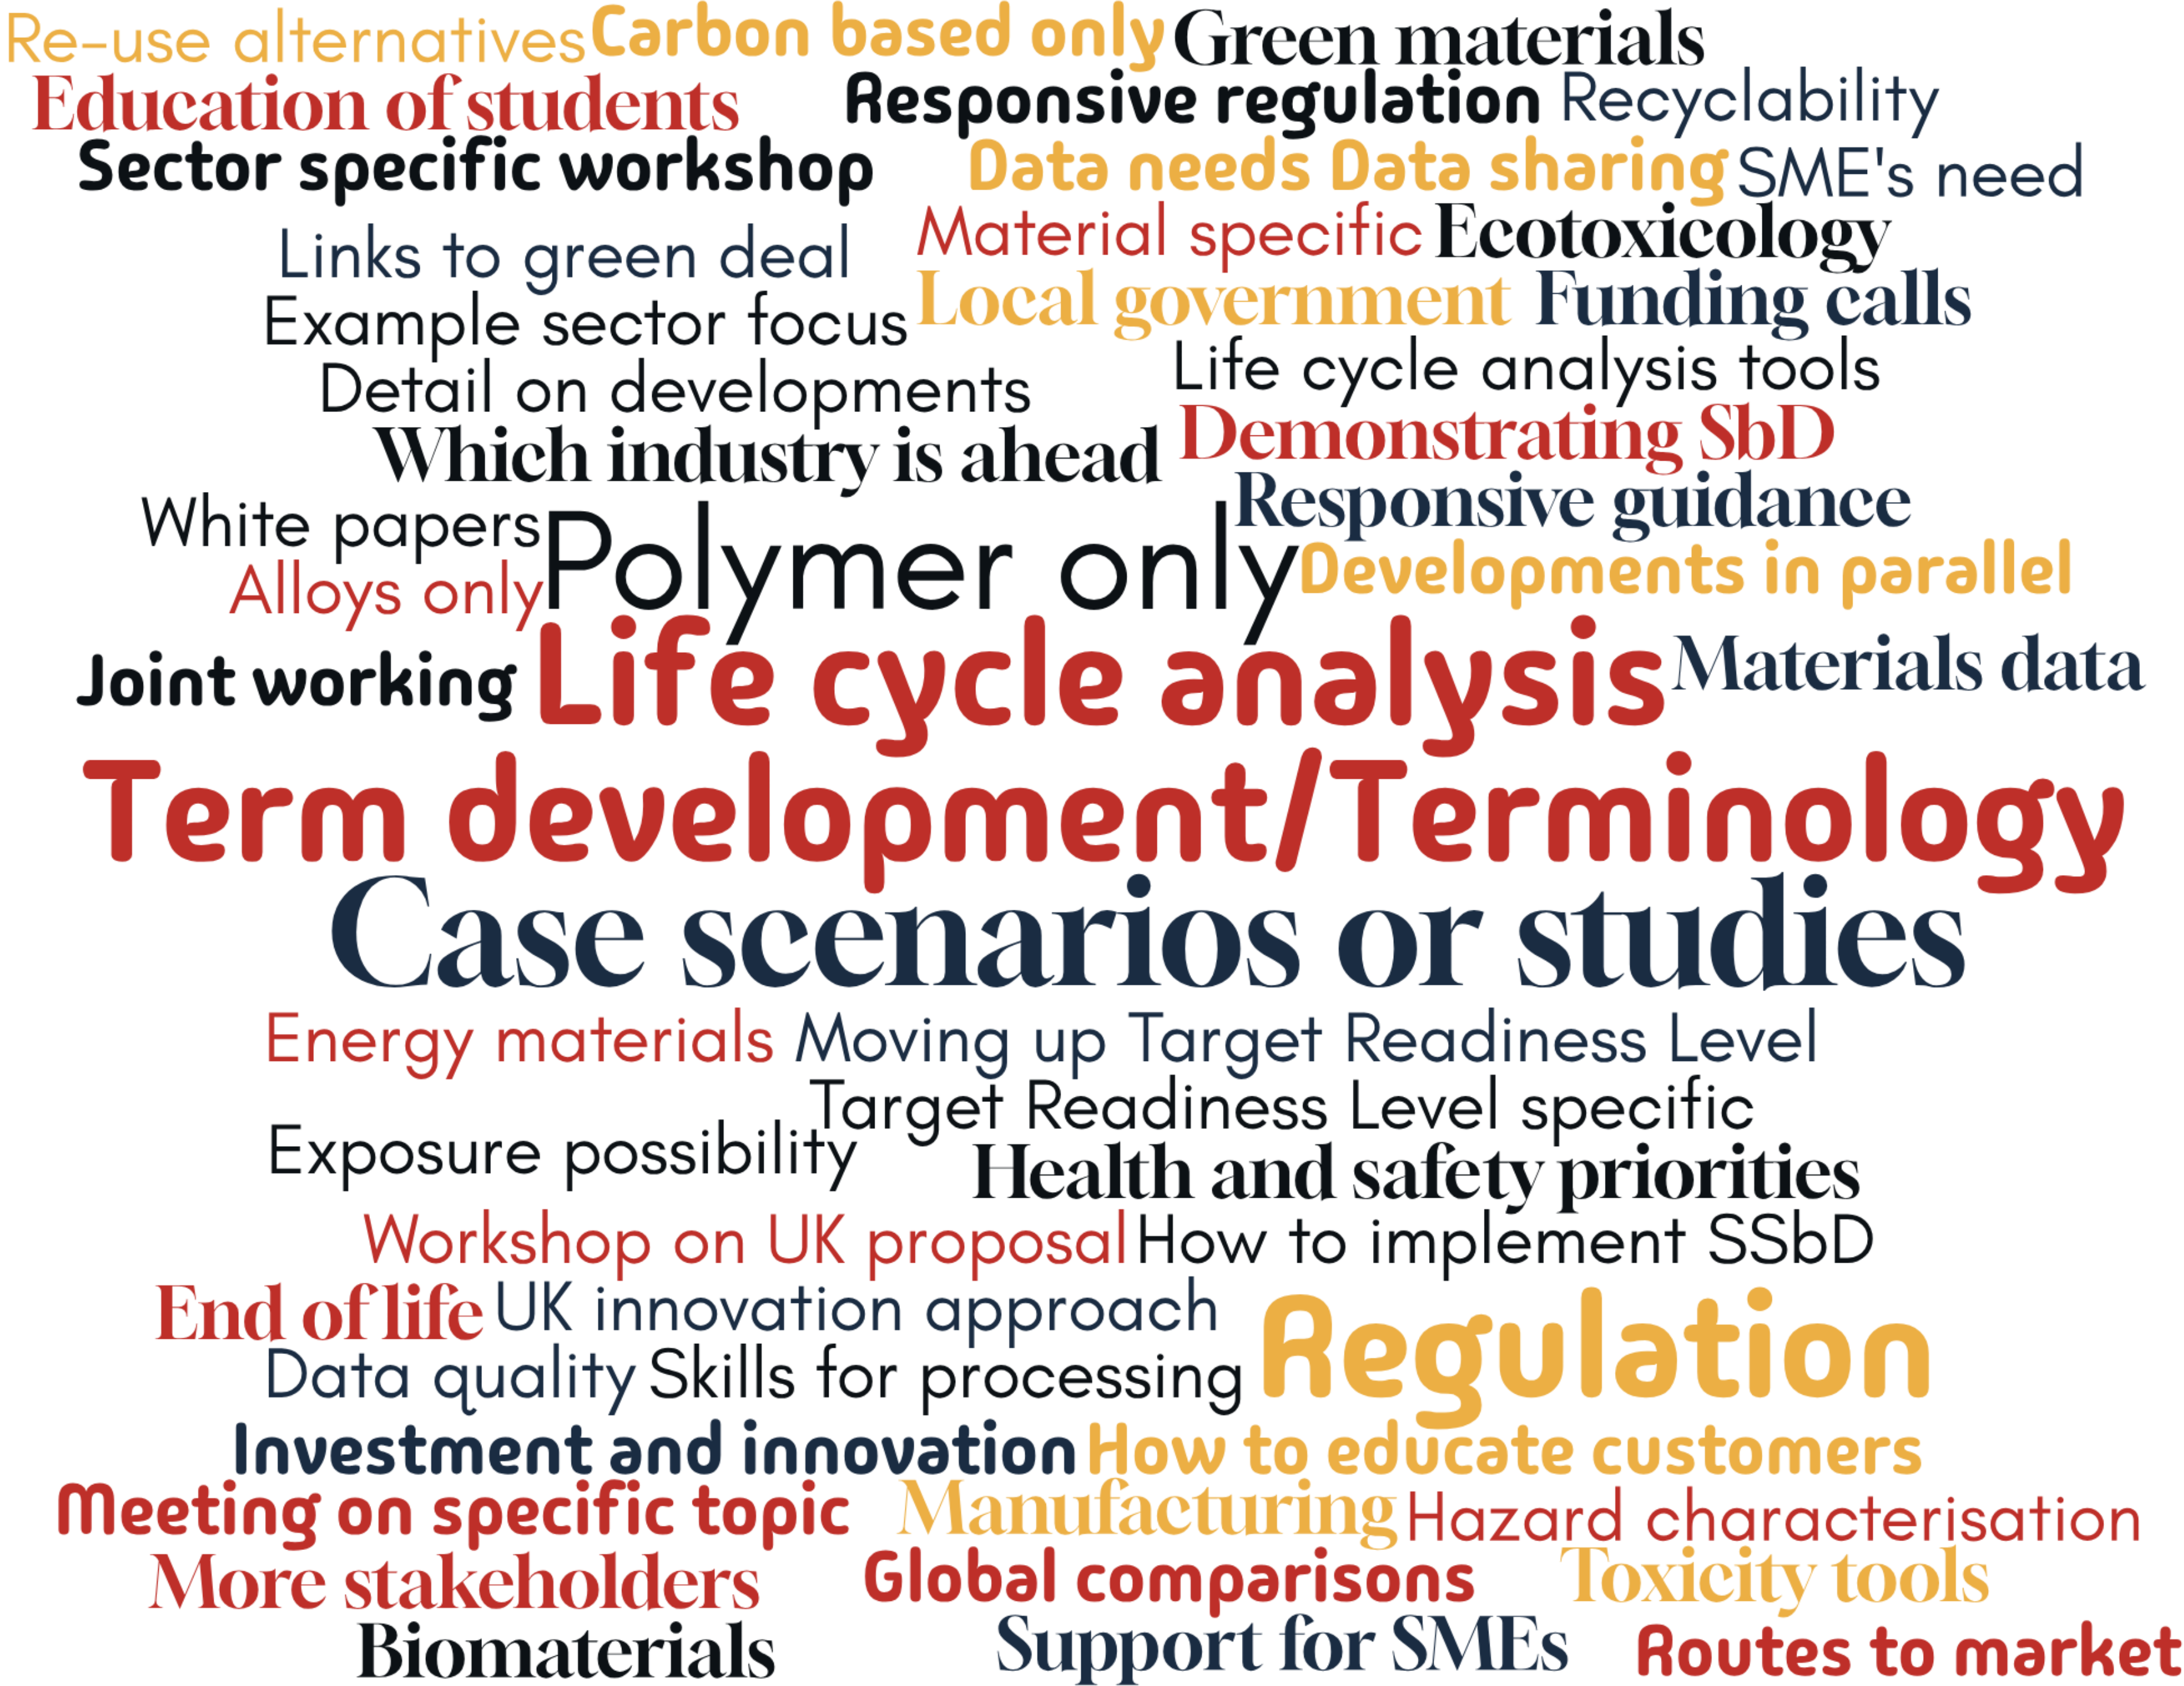

Supplement: d4en00555d5.pdf [file d4en00555d5.pdf]
